# Supplementary material
Source: publisher figshare collection journal article supplement (https://tandf.figshare.com/articles/dataset/_/1569224)
Supplement: Supplementary file 1 [file 1]

**Supplementary figure S1. Release of  $\alpha$ -granule by stimulation with PAR1-AP and PAR4-AP.**

Heparinized whole blood was diluted (1:12) in HEPES buffer containing agonists, anti-GPIIb and anti-P-selectin. Samples were incubated for 10 minutes at room temperature, diluted 1:20 in HEPES buffer and then analysed on a Coulter Epics XL.MCL flow cytometer (Beckman Coulter). The agonist concentrations shown are chosen to induce approximately 20% (low), 50% (medium) or 100% (high) release of  $\alpha$ -granules (percentage of P-selectin-positive platelets). Data is expressed as means  $\pm$  SEM, (n=5).

**Supplementary figure S2. Stimulation with PAR1-AP and PAR4-AP for 55 min induces lysosomal exocytosis in a fraction of human platelets.**

Platelets in diluted whole blood were stimulated for 55 minutes in room temperature with low, medium and high concentration of PAR1-AP (2.5, 5 or 30  $\mu$ M) and PAR4-AP (25, 50 or 150  $\mu$ M). After incubation with anti-LAMP-1, the fraction of platelets exposing LAMP-1 on the surface was analysed by flow cytometry. Data is expressed as means  $\pm$  SEM, (n=5). Samples were compared to control using repeated measures ANOVA followed by Dunnett's multiple comparison tests, significant differences are indicated by \*p < 0.05, \*\* p < 0.01, \*\*\* p < 0.001. Surface expression of LAMP-1 upon PAR1-AP and/or PAR4-AP stimulation was compared, for low, medium and high concentrations respectively, using repeated measures ANOVA followed by Bonferroni's multiple comparison tests, significant differences are indicated by # p < 0.05, ## p < 0.01, ### p < 0.001.

**Supplementary figure S3. The effect of cangrelor on thrombin-induced lysosomal exocytosis from human platelets is maintained at longer stimulation.**

Platelets were incubated with ASA (100  $\mu$ M, 15 min) and cangrelor (5  $\mu$ M, 5 min) alone or in combination and then stimulated with thrombin (0.3 or 1 U/ml). **(A)** Isolated platelets ( $3 \cdot 10^8$  platelets/ml) were stimulated with thrombin for 5 min and NAG activity was analysed in the supernatant. **(B-C)** Platelets in diluted whole blood were stimulated with thrombin for 10 min after which the fraction of (B) LAMP-1 or (C) P-selectin positive platelets was determined using flow cytometry. Data are expressed as means  $\pm$  SEM (n=5). For statistical analysis repeated measures ANOVA, followed by Dunnett's multiple comparison tests against the respective control was used. Significant differences are indicated by \*p < 0.05, \*\*\* p < 0.001.

**Supplementary figure S4. SNAP prevents thrombin-induced lysosomal and  $\alpha$ -granule exocytosis from human platelets in platelet-rich plasma but not in diluted whole blood.**

Platelets were incubated with the NO-donor SNAP (10 or 30  $\mu$ M, 2 min) and stimulated with thrombin (0.3 or 1 U/ml, 1 min). **(A-B)** The fraction of platelets positive for LAMP-1 in diluted whole blood (A) or platelet-rich plasma (PRP) (B) determined using flow cytometry. **(C-D)** P-selectin expression on platelets in diluted whole blood (C) or PRP (D) determined using flow cytometry. Data are expressed as means  $\pm$  SEM (n=5). For statistical analysis repeated measures ANOVA was followed by Dunnett's multiple comparison tests against the respective control. Significant differences are indicated by \*p < 0.05, \*\*\* p < 0.001.

**Supplementary figure S5. SNAP- and PGI<sub>2</sub>-prevented thrombin-induced lysosomal exocytosis from human platelets is maintained at longer stimulation.**

Platelets were incubated with the NO-donor SNAP (10  $\mu$ M, 2 min) and PGI<sub>2</sub> (1  $\mu$ M, 2 min) alone or in combination and stimulated with thrombin (0.3 or 1 U/ml). **(A)** Isolated platelets ( $3 \cdot 10^8$  platelets/ml) were stimulated with thrombin for 5 min and NAG activity was analysed in the supernatant. **(B)** Platelets in diluted whole blood were stimulated with thrombin (10 min) and the fraction of LAMP-1 positive platelets was determined using flow cytometry. **(C)** The same experiment as in B performed in PRP. **(D)** Platelets in diluted whole blood were stimulated with thrombin (10 min) and the fraction of P-selectin positive platelets was determined using flow cytometry. **(E)** The same experiment as in D performed in PRP. Data are expressed as means  $\pm$  SEM (n=5). For statistical analysis repeated measures ANOVA was followed by Dunnett's multiple comparison tests against the respective control. Significant differences are indicated by \*p < 0.05, \*\* p < 0.01, \*\*\* p < 0.001.
